# Supplementary material for: Functional networks of the human bromodomain-containing proteins
Source: Frontiers journal article supplement (doi:10.3389/fbinf.2022.835892), 2022-08-10
Supplement: Image_1.pdf [file Image_1.pdf]

# Supplementary Figure 1

A

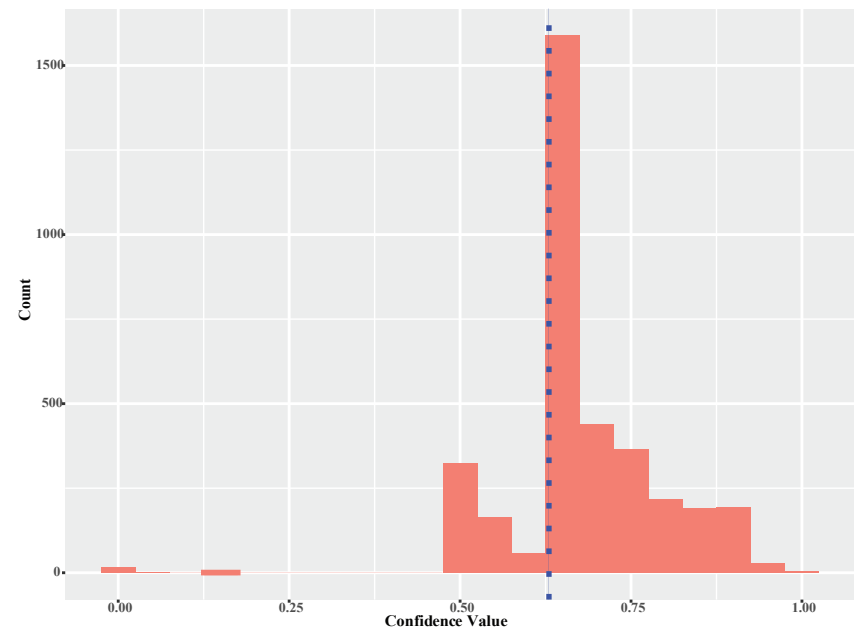

B

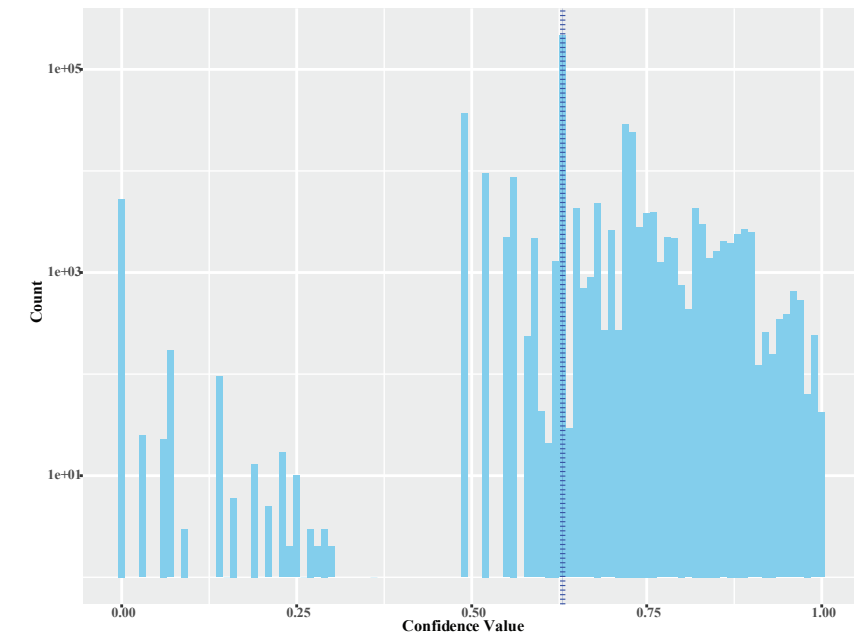

**The distribution of confidence value of interactions in HIPPIE.**  
HIPPIE calculated the confidence value (X-axis) of each interaction based on the publications and techniques used, etc. The blue dotted line refers to the medium confidence value 0.63 suggested by HIPPIE.  
A) Confidence value of protein-proteins interactions derived from HIPPIE in the global PPIN.  
B) Confidence value of protein-proteins interactions from HIPPIE in BRD PPIN.
