# Supplementary material for: Functional networks of the human bromodomain-containing proteins
Source: Frontiers journal article supplement (doi:10.3389/fbinf.2022.835892), 2022-08-10
Supplement: Image_2.pdf [file Image_2.pdf]

Supplementary Figure 2

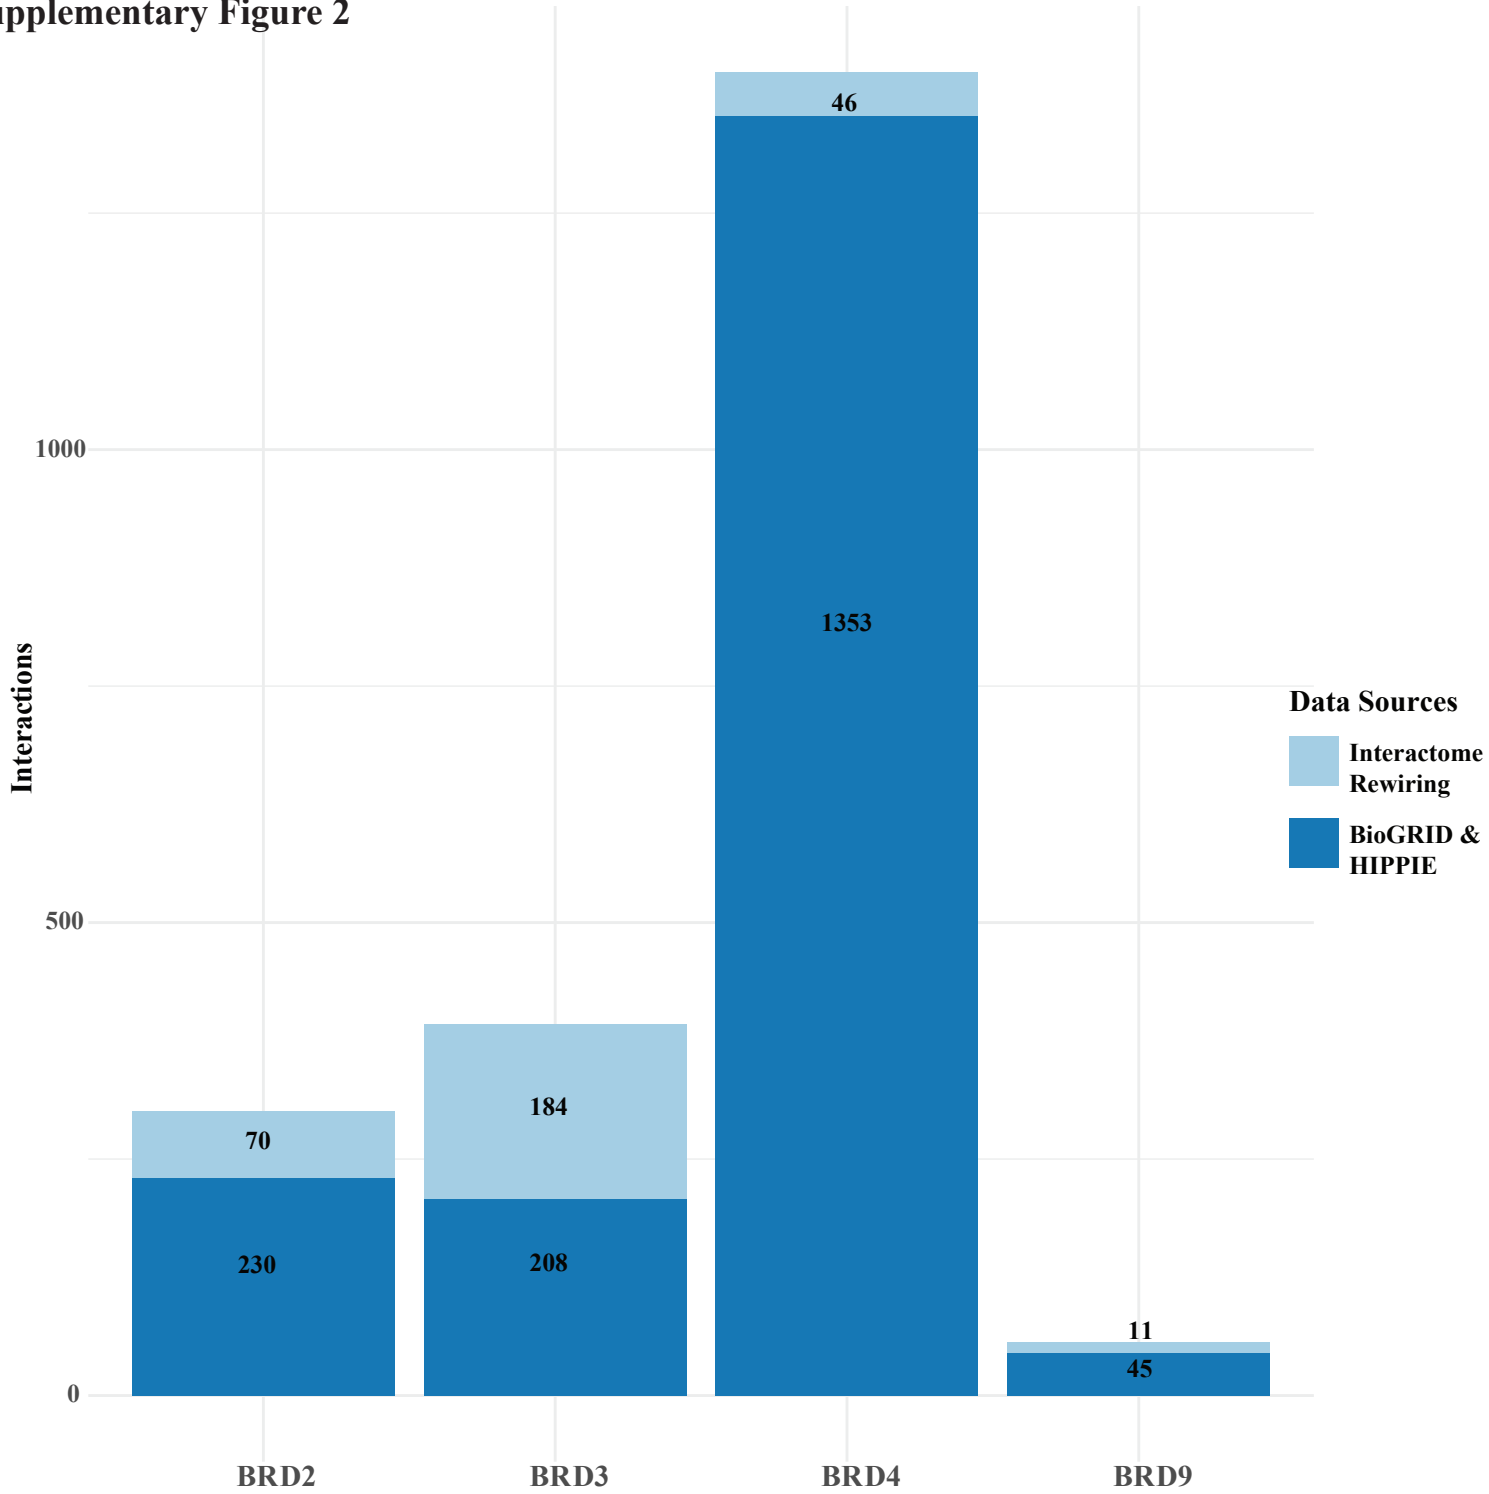

Interaction summary of BRD2,3,4 and BRD9 derived from public databases and the recent publication.  
X-axis: 4 different BRD proteins; Y-axis: number of interactions from different sources.
